# Supplementary material for: Can we decipher the information content contained within cyclic nucleotide signals?
Source: PubMed Central journal article supplement — J Gen Physiol. 2014 Jan;143(1):17–27. doi: 10.1085/jgp.201311095 (PMC3874573; doi:10.1085/jgp.201311095), 2014-01
Supplement: supp_jgp.201311095_JGP_201311095_sm.pdf [file supp_jgp.201311095_JGP_201311095_sm.pdf]

Rich et al., <http://www.jgp.org/cgi/content/full/jgp.201311095/DC1>

Compartmental model used to describe the distribution of cyclic nucleotides

Compartmental models have been previously used to describe the localization of cyclic nucleotide signals (Saucerman et al., 2014, and references therein). Here, we present a compartmental model that incorporates recent estimates of near-membrane PDE activity. In this model, cAMP is produced by AC in compartment 1. The flux of cAMP from compartment 1 to the bulk cytosol (compartment 2) is markedly slower than the flux of cAMP within either compartment 1 or 2. In contrast to our previous models, PDE activity is markedly lower in compartment 1 than in compartment 2. This model is described by the following equations (variables are defined in Table S1):

$$\frac{d[C_1]}{dt} = E_{AC} + \frac{J_{12}}{V_1}([C_2] - [C_1]) - \frac{E_1 \cdot [C_1]}{K_{M1} + [C_1]}$$

$$\frac{d[C_2]}{dt} = \frac{J_{12}}{V_2}([C_1] - [C_2]) - \frac{E_2 \cdot [C_2]}{K_{M2} + [C_2]}$$

Simulations of this model demonstrate the importance of diffusional barriers or other hindrances to free diffusion in segregating cyclic nucleotide signals.

Kinetic model used to describe difficulties in the measurement of cyclic nucleotide signals

Here we present a realistic mathematical description of the cGMP signaling pathway. In this model, activation of pGC triggers cGMP synthesis. Dephosphorylation of pGC causes receptor desensitization and subsequent reduction in the rate of cGMP synthesis. PDE type 5 (PDE5), which is regulated by cGMP binding to the noncatalytic site and phosphorylation, hydrolyzes cGMP. The sinusoidal regulation of pGC activity (periods [T] of 30, 300, and 3,000 s) used in this model is analogous to oscillations in ANP. These inputs triggered sinusoidal intracellular cGMP accumulation with a lag that varied with stimulus frequency. The amplitude of cGMP oscillations increased with the period of sinusoidal stimulation. The model is described by the following equations (parameter definitions and values are provided in Table S2).

$$[cG_f] = [cGMP] - [PDE5]([PDE5 \cdot P] + [cG \cdot PDE5 \cdot P]) - [buf][cG \cdot buf] \quad (1)$$

$$PDE5 = \frac{([cG \cdot PDE5 \cdot P] + [PDE5 \cdot P])[cG_f]E_{PDE5}}{K_{m1} + [cG_f]}$$

$$f = \frac{1}{2} \sin\left(\frac{2\pi t}{T} - \frac{\pi}{2}\right) + \frac{1}{2}$$

$$\frac{d[cGMP]}{dt} = [pGC \cdot P]E_{pGCbas} + f \times [pGC \cdot P]E_{pGC} - PDE5$$

$$\frac{d[pGC \cdot P]}{dt} = k_{kin}[pGC] - k_{pp2b}[pGC \cdot P]$$

$$\frac{d[pGC]}{dt} = -k_{kin}[pGC] + k_{pp2b}[pGC \cdot P]$$

$$\frac{d[cG \cdot PDE5]}{dt} = k_1[PDE5][cG_f] -$$

$$\left(k_{-1} + \frac{k_2[cG_f]}{[cG_f] + K_{1/2}}\right)[cG \cdot PDE5] + k_{-2}[cG \cdot PDE5 \cdot P]$$

$$\frac{d[cG \cdot PDE5 \cdot P]}{dt} = \frac{k_2[cG_f]}{[cG_f] + K_{1/2}}[cG \cdot PDE5] -$$

$$(k_{-2} + k_3)[cG \cdot PDE5 \cdot P] + k_{-3}[PDE5 \cdot P]$$

$$\frac{d[PDE5 \cdot P]}{dt} = k_3[cG \cdot PDE5 \cdot P] - (k_{-3} + k_4)[PDE5 \cdot P] +$$

$$\frac{k_4[cG_f]}{[cG_f] + K_{1/2}}[PDE5]$$

$$\frac{d[PDE5]}{dt} = k_4[PDE5 \cdot P] - \frac{k_4[cG_f]}{[cG_f] + K_{1/2}}[PDE5] -$$

$$\left(k_1 + \frac{k_4[cG_f]}{[cG_f] + K_{1/2}}\right)[PDE5][cG_f] + k_{-1}[cG \cdot PDE5]$$

$$\frac{d[buf]}{dt} = -k_{bufF}[cG_f][buf] + k_{bufR}[cG \cdot buf]$$

$$\frac{d[cG \cdot buf]}{dt} = k_{bufF}[cG_f][buf] - k_{bufR}[cG \cdot buf]$$

TABLE S1  
Parameters used in simulations of compartmentalized signaling as depicted in Fig. 1

| Parameter | Parameter definition                                | Value                                                                             | Initial condition    | Reference                                        |
|-----------|-----------------------------------------------------|-----------------------------------------------------------------------------------|----------------------|--------------------------------------------------|
| $[C_1]$   | concentration of cAMP in compartment 1 <sup>a</sup> |                                                                                   | 0.1355 $\mu\text{M}$ |                                                  |
| $[C_2]$   | concentration of cAMP in compartment 2 <sup>a</sup> |                                                                                   | 0.0045 $\mu\text{M}$ |                                                  |
| $V_1$     | volume of compartment 1                             | 0.3 pL                                                                            |                      |                                                  |
| $V_2$     | volume of compartment 2                             | 2.7 pL                                                                            |                      | Feinstein et al., 2012                           |
| $J_{12}$  | Flux coefficient between compartments 1 and 2       | $8 \times 10^{-16}$ liter/s                                                       |                      | Rich et al., 2000, 2001                          |
| $E_{AC}$  | AC activity                                         | Basal: 0.03 $\mu\text{M}/\text{min}$<br>Stimulated: 0.66 $\mu\text{M}/\text{min}$ |                      |                                                  |
| $E_1$     | Maximal PDE activity in $C_1$                       | 0.8 $\mu\text{M}/\text{min}$                                                      |                      | Unpublished data                                 |
| $E_2$     | Maximal PDE activity in $C_2$                       | 4.4 $\mu\text{M}/\text{min}$                                                      |                      | Feinstein et al., 2012                           |
| $K_{m1}$  | Michaelis constant for PDE activity in $C_1$        | 4 $\mu\text{M}$                                                                   |                      | Houslay et al., 1998;<br>Richter and Conti, 2004 |
| $K_{m2}$  | Michaelis constant for PDE activity in $C_2$        | 4 $\mu\text{M}$                                                                   |                      | Houslay et al., 1998;<br>Richter and Conti, 2004 |

Note that based upon recent studies (unpublished data) PDE activity in compartment 1 is markedly lower than PDE activity in compartment 2.  
<sup>a</sup>Initial conditions were estimated by running simulation to equilibrium with basal AC activity.

TABLE S2  
Parameters used in simulations describing oscillatory cGMP signals

| Parameter  | Parameter definition                                                      | Value                                                                             | Initial condition     | Reference                                         |
|------------|---------------------------------------------------------------------------|-----------------------------------------------------------------------------------|-----------------------|---------------------------------------------------|
| $E_{pGC}$  | Maximal pGC activity <sup>b</sup>                                         | Basal: 0.01 $\mu\text{M}/\text{min}$<br>Stimulated: 0.33 $\mu\text{M}/\text{min}$ |                       |                                                   |
| $T$        | Period of ANP oscillations                                                | 30, 300, or 3,000 s                                                               |                       |                                                   |
| $E_{pDE5}$ | Maximal PDE5 activity <sup>a</sup>                                        | 2 $\mu\text{M}/\text{min}$                                                        |                       |                                                   |
| $f_{pGCP}$ | Fraction of phosphorylated pGC <sup>a</sup>                               |                                                                                   | 0.8                   |                                                   |
| $f_{pGC}$  | Fraction of dephosphorylated pGC <sup>a</sup>                             |                                                                                   | 0.2                   |                                                   |
| $[cGMP]$   | Concentration of total cGMP <sup>a</sup>                                  |                                                                                   | 0.056 $\mu\text{M}$   |                                                   |
| $[cG_P]$   | Concentration of free cGMP                                                |                                                                                   | Estimated using Eq. 3 |                                                   |
| $K_{m1}$   | Michaelis constant for PDE5 activity                                      | 4 $\mu\text{M}$                                                                   |                       | Francis et al., 2009,<br>and references therein   |
| $k_{kin}$  | Rate constant of pGC phosphorylation                                      | $1 \times 10^{-2} \text{ s}^{-1}$                                                 |                       | Adapted from Henesy et al., 2012                  |
| $k_{pp2b}$ | Rate constant for pGC dephosphorylation                                   | $5 \times 10^{-3} \text{ s}^{-1}$                                                 |                       | Adapted from Henesy et al., 2012                  |
| $k_1$      | Rate constant for cGMP binding to PDE5                                    | $1.81 \times 10^4 \text{ M}^{-1} \times \text{s}^{-1}$                            |                       | Batchelor et al., 2010,<br>and references therein |
| $k_{-1}$   | Rate constant for cGMP release from PDE5                                  | $0.0868 \text{ s}^{-1}$                                                           |                       | Batchelor et al., 2010,<br>and references therein |
| $k_2$      | Rate constant for cGMP-bound PDE5 phosphorylation                         | $0.246 \text{ s}^{-1}$                                                            |                       | Batchelor et al., 2010,<br>and references therein |
| $K_{1/2}$  | cGMP concentration required for half-maximal rate of PDE5 phosphorylation | 0.25 $\mu\text{M}$                                                                |                       | Batchelor et al., 2010,<br>and references therein |
| $k_{-2}$   | Rate constant for cGMP-bound PDE5 dephosphorylation                       | $0.154 \text{ s}^{-1}$                                                            |                       | Batchelor et al., 2010,<br>and references therein |
| $k_3$      | Rate of cGMP binding to phosphorylated PDE5 <sup>b</sup>                  | $1.21 \times 10^{-3} \text{ M}^{-1} \times \text{s}^{-1}$                         |                       |                                                   |
| $k_{-3}$   | Rate of cGMP release from phosphorylated PDE5 <sup>b</sup>                | $1.13 \times 10^{-5} \text{ s}^{-1}$                                              |                       |                                                   |
| $k_4$      | Rate of PDE5 phosphorylation <sup>b</sup>                                 | $1 \times 10^{-2} \text{ s}^{-1}$                                                 |                       |                                                   |
| $k_{-4}$   | Rate of PDE5 dephosphorylation <sup>b</sup>                               | $5 \times 10^{-3} \text{ s}^{-1}$                                                 |                       |                                                   |
| $buf$      | Buffering capacity of cGMP sensor                                         | 0, 0.05, 0.5, or 5 $\mu\text{M}$                                                  |                       |                                                   |
| $K_{bufF}$ | On rate for cGMP binding                                                  | $1 \times 10^6 \text{ M}^{-1} \times \text{s}^{-1}$                               |                       |                                                   |
| $K_{bufR}$ | Off rate for cGMP binding                                                 | $1 \text{ s}^{-1}$                                                                |                       |                                                   |

<sup>a</sup>Initial conditions were estimated by running simulation to equilibrium with basal GC activity.

<sup>b</sup>Fit to experimental data.

## REFERENCES

- Batchelor, A.M., K. Bartus, C. Reynell, S. Constantinou, E.J. Halvey, K.F. Held, W.R. Dostmann, J. Vernon, and J. Garthwaite. 2010. Exquisite sensitivity to subsecond, picomolar nitric oxide transients conferred on cells by guanylyl cyclase-coupled receptors. *Proc. Natl. Acad. Sci. USA.* 107:22060–22065. <http://dx.doi.org/10.1073/pnas.1013147107>
- Feinstein, W.P., B. Zhu, S.J. Leavesley, S.L. Sayner, and T.C. Rich. 2012. Assessment of cellular mechanisms contributing to cAMP compartmentalization in pulmonary microvascular endothelial cells. *Am. J. Physiol. Cell Physiol.* 302:C839–C852. <http://dx.doi.org/10.1152/ajpcell.00361.2011>
- Francis, S.H., J.D. Corbin, and E. Bischoff. 2009. Cyclic GMP-hydrolyzing phosphodiesterases. *Handbook Exp. Pharmacol.* 191:367–408. [http://dx.doi.org/10.1007/978-3-540-68964-5\\_16](http://dx.doi.org/10.1007/978-3-540-68964-5_16)
- Henesy, M.B., A.L. Britain, B. Zhu, L. Amable, R.E. Honkanen, J.D. Corbin, S.H. Francis, and T.C. Rich. 2012. Calcineurin regulates homologous desensitization of natriuretic peptide receptor-A and inhibits ANP-induced testosterone production in MA-10 cells. *PLoS ONE.* 7:e41711. <http://dx.doi.org/10.1371/journal.pone.0041711>
- Houslay, M.D., M. Sullivan, and G.B. Bolger. 1998. The multienzyme PDE4 cyclic adenosine monophosphate-specific phosphodiesterase family: intracellular targeting, regulation, and selective inhibition by compounds exerting anti-inflammatory and antidepressant actions. *Adv. Pharmacol.* 44:225–342. [http://dx.doi.org/10.1016/S1054-3589\(08\)60128-3](http://dx.doi.org/10.1016/S1054-3589(08)60128-3)
- Rich, T.C., K.A. Fagan, H. Nakata, J. Schaack, D.M.F. Cooper, and J.W. Karpén. 2000. Cyclic nucleotide-gated channels colocalize with adenylyl cyclase in regions of restricted cAMP diffusion. *J. Gen. Physiol.* 116:147–162. <http://dx.doi.org/10.1085/jgp.116.2.147>
- Rich, T.C., K.A. Fagan, T.E. Tse, J. Schaack, D.M.F. Cooper, and J.W. Karpén. 2001. A uniform extracellular stimulus triggers distinct cAMP signals in different compartments of a simple cell. *Proc. Natl. Acad. Sci. USA.* 98:13049–13054. <http://dx.doi.org/10.1073/pnas.221381398>
- Richter, W., and M. Conti. 2004. The oligomerization state determines regulatory properties and inhibitor sensitivity of type 4 cAMP-specific phosphodiesterases. *J. Biol. Chem.* 279:30338–30348. <http://dx.doi.org/10.1074/jbc.M312687200>
- Saucerman, J.J., E.C. Greenwald, and R. Polanska-Grabowska. 2014. Perspectives on: Cyclic nucleotide microdomains and signaling specificity: Mechanisms of cyclic AMP compartmentalization revealed by computational models. *J. Gen. Physiol.* 143:■■■■–■■■■.
